# Supplementary material for: Understanding and defining sanitation insecurity: women’s gendered experiences of urination, defecation and menstruation in rural Odisha, India
Source: PubMed Central journal article supplement (PMC5640070; doi:10.1136/bmjgh-2017-000414), 2017-10-09
Supplement: bmjgh-2017-000414supp001.pdf [file bmjgh-2017-000414supp001.pdf]

**Supplemental Table 1a: Concerns noted by participants in free list activities and definitions used for coding**

---

| <i>Concern</i>                                                    | <i>Definition</i>                                                                                                                    |
|-------------------------------------------------------------------|--------------------------------------------------------------------------------------------------------------------------------------|
| <i>Themes in all Urination, Defecation and Menstruation Lists</i> |                                                                                                                                      |
| <b>Fear</b>                                                       | Fear when going to urinate/ defecate/ manage menses, whether of animals, ghosts, people, or harsh weather.                           |
| <b>Feel Dirty</b>                                                 | Concern about feeling or getting dirty when urinating/ defecating/ managing menses.                                                  |
| <b>Health</b>                                                     | Concern that health is compromised when urinating/ defecating or in relation to menstruation.                                        |
| <b>Need Support</b>                                               | Concern unable to urinate/ defecate/ manage menses alone because of need for company or support.                                     |
| <b>People</b>                                                     | Concern of being seen by people when urinating/ defecating/ managing menses or that menstrual materials will be seen.                |
| <b>Shame</b>                                                      | Concern of being publically shamed or feeling ashamed if seen by others when urinating/ defecating/ managing menses.                 |
| <b>Support Barrier</b>                                            | Concern that someone will not provide support / will get upset if asked to accompany to urinate/ defecate/ manage menses.            |
| <b>Water</b>                                                      | Concern getting and carrying water for urinating/ defecating/ managing menses is a great difficulty.                                 |
| <b>Work</b>                                                       | Concern that workload related to urination/ defecation/ menstrual management activities is high.                                     |
| <i>Themes in Urination and Defecation Lists</i>                   |                                                                                                                                      |
| <b>Dependents</b>                                                 | Concern for well-being of dependents - child, elderly, infirm- when leaving them to urinate/ defecate.                               |
| <b>Difficulty-Pain</b>                                            | Concern about pain or difficulty related to urination/ defecation, including general body pain, strain, etc.                         |
| <b>Fall</b>                                                       | Concern for falling when going to or in the act of urinating/ defecating.                                                            |
| <b>Harm</b>                                                       | Concern about being harmed when urinating/ defecating, whether by an animal, person, or environmental conditions.                    |
| <b>Incontinence</b>                                               | Concern about the inability to hold urination/ defecation due to physical ailment.                                                   |
| <b>Light</b>                                                      | Concern about not having light when urinating/ defecating at night.                                                                  |
| <b>Menstruation</b>                                               | Concern about increased difficulty urinating/ defecating at the time of menstruation.                                                |
| <b>No Proper Facility</b>                                         | Concern that there is not a proper facility for urinating/ defecating available.                                                     |
| <b>Place</b>                                                      | Concern the place available and used for urinating/ defecating is problematic, whether dirty, far, hard to access, in the open, etc. |
| <b>Squat</b>                                                      | Concern about having difficulty sitting, squatting, or getting up and down when urinating/ defecating.                               |
| <b>Stand</b>                                                      | Concern for need to stand up in the middle of urination/ defecation if someone suddenly appears.                                     |
| <b>Support Others</b>                                             | Concern that there is difficulty providing support to others for their urination/ defecation needs.                                  |
| <b>Suppress</b>                                                   | Concern about the need to suppress because various factors prevent attention to personal needs.                                      |
| <b>Urgency</b>                                                    | Concern about experiencing and sudden, strong urge to urinate/ defecate.                                                             |
| <b>Walk</b>                                                       | Concern about walking to the place for urination/ defecation.                                                                        |
| <b>Wet</b>                                                        | Concern that she will have to get wet when going to urinate/defecate during the rains.                                               |

---

**Supplemental Table 1b: Concerns noted by participants in free list activities and definitions used for coding (Continued)**

| <i>Concern</i>                        | <i>Definition</i>                                                                                                               |
|---------------------------------------|---------------------------------------------------------------------------------------------------------------------------------|
| <i>Themes in Urination List Only</i>  |                                                                                                                                 |
| <b>Infection</b>                      | Concern for infection if unintentionally urinating over the urine of others.                                                    |
| <b>Limit Water</b>                    | Concern about the need to limit water in order to reduce need for urination.                                                    |
| <b>Urine Contact</b>                  | Concern about accidentally touching urine and therefore becoming untouchable or making others untouchable.                      |
| <b>Urine On Self</b>                  | Concern about getting urine on the body because of inability to suppress.                                                       |
| <i>Themes in Defecation List Only</i> |                                                                                                                                 |
| <b>Cleaning Self</b>                  | Concern about personal cleaning after defecation.                                                                               |
| <b>Concern For Others</b>             | Concerns for others' safety or needs when defecating, typically their concern for daughters or daughters-in-law.                |
| <b>Defecate On Self</b>               | Concern about getting feces on the body because of inability to suppress.                                                       |
| <b>Defecation Time</b>                | Concerns about the amount of time defecation takes to complete because location is far, others around, cleaning extensive, etc. |
| <b>Fixed Time</b>                     | Concern about having to defecate at a fixed time of day.                                                                        |
| <b>Forced Latrine Use</b>             | Concern about being forced to use the latrine against will, either all the time or during certain times of day or year.         |
| <b>Future Needs</b>                   | Concerns about defecating in the future given deteriorating health, inevitable departure of daughters to marriage, etc.         |
| <b>Latrine Conditions</b>             | Concern that the conditions of the household latrine are poor.                                                                  |
| <b>Latrine Unusable</b>               | Concern that the latrine available is unsuitable for defecating.                                                                |
| <b>Limit Food</b>                     | Concern about the need to limit food in order to reduce need for defecation.                                                    |
| <b>No Money</b>                       | Concern for lacking money to construct or maintain a latrine.                                                                   |
| <b>No Gov. Support</b>                | Concern for insufficient support, financial or otherwise, from government to build or maintain a latrine.                       |
| <b>Obligations</b>                    | Concern regarding the need to attend to household obligations or responsibilities to others before tending to defecation needs. |
| <b>Scold</b>                          | Concern about being scolded due to defecation behavior (i.e. taking time, going to wrong place, improperly caring for others).  |

**Supplemental Table 1c: Concerns noted by participants in free list activities and definitions used for coding (Continued)**

---

| <i>Concern</i>                          | <i>Definition</i>                                                                                                                |
|-----------------------------------------|----------------------------------------------------------------------------------------------------------------------------------|
| <i>Themes in Menstruation List Only</i> |                                                                                                                                  |
| <b>Access to Materials</b>              | Concern about barriers to getting materials wanted /needed.                                                                      |
| <b>Bathing</b>                          | Concern about bathing at onset of menstruation, regardless of time of day, night, season.                                        |
| <b>Changing Cloth</b>                   | Concern with changing the cloth or pad, whether finding a place, not having privacy, etc.                                        |
| <b>Disposal</b>                         | Concern about where and how to dispose of menstrual cloths or pads.                                                              |
| <b>Drying Cloth</b>                     | Concerns about where/ how to dry cloth after washing.                                                                            |
| <b>Falling Cloth</b>                    | Concern that cloth will fall from clothing.                                                                                      |
| <b>Fertility</b>                        | Concern about fertility related to menstrual cycle, whether about ability to have children or plan for them due to irregularity. |
| <b>Forced Separation</b>                | Concern about the need to 'stay separate' at night until bathing possible due to menstrual onset.                                |
| <b>General Discomfort</b>               | Concern about generally feeling uncomfortable, bad, weak, or irritated because of menstruation.                                  |
| <b>Heavy Bleeding</b>                   | Concern about heavy menstrual flow.                                                                                              |
| <b>Household Duties</b>                 | Concern about ability to effectively perform household work during menstruation.                                                 |
| <b>Irregularity</b>                     | Concern about not having a regular menstrual cycle.                                                                              |
| <b>Leaks</b>                            | Concern for menstrual leaks on cloths, bed, etc.                                                                                 |
| <b>Mobility</b>                         | Concern about inability to move freely during menstruation, because of cloth, pad, restrictions, discomfort, etc.                |
| <b>Odor</b>                             | Concern that body, cloth or clothes is generating a bad odor.                                                                    |
| <b>Pain</b>                             | Concern about pain, whether in the head, stomach, legs, back or hands.                                                           |
| <b>Restrictions</b>                     | Concern for restrictions or requirements that are imposed because menstruation.                                                  |
| <b>Sleep</b>                            | Concern about inability to sleep well during menstruation.                                                                       |
| <b>Start when Away</b>                  | Concern that menstrual cycle will start when away from home.                                                                     |
| <b>Storing Cloth</b>                    | Concern about storing the reusable menstrual cloth between uses.                                                                 |
| <b>Untouchability</b>                   | Concern about being untouchable, making things untouchable, or others touching things made untouchable by menstruation.          |
| <b>Urination</b>                        | Concern with urinating during menstruation.                                                                                      |
| <b>Washing Cloth</b>                    | Concern with washing cloths used to absorb menstrual blood.                                                                      |
| <b>Wounds</b>                           | Concern about getting wounds on legs from their menstrual pads or cloths.                                                        |

---

**Supplemental Table 2: Type and frequency of urination-related concerns overall, and by participant type and latrine status**

| Concern            | All  |       | 1. Unmarried (UM) |       | 2. Recently Married (RM) |       | 3. Married (M) |       | 4. Older Woman (OW) |       | Latrine At Home |       | No Latrine At Home |       |
|--------------------|------|-------|-------------------|-------|--------------------------|-------|----------------|-------|---------------------|-------|-----------------|-------|--------------------|-------|
|                    | N=63 |       | n=15              |       | n=11                     |       | n=21           |       | n=16                |       | n=34            |       | n=29               |       |
| Place              | 47   | 74.6% | 11                | 73.3% | 10                       | 90.9% | 14             | 66.7% | 12                  | 75.0% | 25              | 73.5% | 22                 | 75.9% |
| People             | 42   | 66.7% | 14                | 93.3% | 6                        | 54.5% | 12             | 57.1% | 10                  | 62.5% | 22              | 64.7% | 20                 | 69.0% |
| Fear               | 40   | 63.5% | 13                | 86.7% | 10                       | 90.9% | 10             | 47.6% | 7                   | 43.8% | 22              | 64.7% | 17                 | 58.6% |
| Need Support       | 26   | 41.3% | 10                | 66.7% | 5                        | 45.5% | 7              | 33.3% | 4                   | 25.0% | 14              | 41.2% | 12                 | 41.4% |
| Wet                | 21   | 33.3% | 9                 | 60.0% | 3                        | 27.3% | 4              | 19.0% | 5                   | 31.3% | 9               | 26.5% | 12                 | 41.4% |
| Squat              | 21   | 33.3% | 0                 | 0.0%  | 3                        | 27.3% | 6              | 28.6% | 12                  | 75.0% | 13              | 38.2% | 8                  | 27.6% |
| Urine Infection    | 19   | 30.2% | 6                 | 40.0% | 4                        | 36.4% | 6              | 28.6% | 3                   | 18.8% | 10              | 29.4% | 9                  | 31.0% |
| Get Dirty          | 17   | 27.0% | 9                 | 60.0% | 3                        | 27.3% | 4              | 19.0% | 1                   | 6.3%  | 8               | 23.5% | 9                  | 31.0% |
| Suppress           | 16   | 25.4% | 5                 | 33.3% | 5                        | 45.5% | 3              | 14.3% | 3                   | 18.8% | 11              | 32.4% | 5                  | 17.2% |
| Work               | 12   | 19.0% | 5                 | 33.3% | 1                        | 9.1%  | 4              | 19.0% | 2                   | 12.5% | 4               | 11.8% | 8                  | 27.6% |
| No Proper Facility | 11   | 17.5% | 4                 | 26.7% | 3                        | 27.3% | 1              | 4.8%  | 3                   | 18.8% | 5               | 14.7% | 6                  | 20.7% |
| Shame              | 10   | 15.9% | 6                 | 40.0% | 0                        | 0.0%  | 3              | 14.3% | 1                   | 6.3%  | 6               | 17.6% | 4                  | 13.8% |
| Support Others     | 9    | 14.3% | 3                 | 20.0% | 0                        | 0.0%  | 3              | 14.3% | 3                   | 18.8% | 5               | 14.7% | 4                  | 13.8% |
| Walk               | 9    | 14.3% | 0                 | 0.0%  | 1                        | 9.1%  | 3              | 14.3% | 5                   | 31.3% | 3               | 8.8%  | 6                  | 20.7% |
| Support Barrier    | 8    | 12.7% | 5                 | 33.3% | 0                        | 0.0%  | 3              | 14.3% | 0                   | 0.0%  | 2               | 5.9%  | 6                  | 20.7% |
| Stand              | 8    | 12.7% | 5                 | 33.3% | 1                        | 9.1%  | 1              | 4.8%  | 1                   | 6.3%  | 4               | 11.8% | 4                  | 13.8% |
| Urine On Self      | 8    | 12.7% | 3                 | 20.0% | 1                        | 9.1%  | 2              | 9.5%  | 2                   | 12.5% | 3               | 8.8%  | 5                  | 17.2% |
| Dependents         | 7    | 11.1% | 2                 | 13.3% | 2                        | 18.2% | 2              | 9.5%  | 1                   | 6.3%  | 4               | 11.8% | 3                  | 10.3% |
| Urine Contact      | 6    | 9.5%  | 1                 | 6.7%  | 0                        | 0.0%  | 3              | 14.3% | 2                   | 12.5% | 1               | 2.9%  | 5                  | 17.2% |
| Harm               | 5    | 7.9%  | 1                 | 6.7%  | 0                        | 0.0%  | 1              | 4.8%  | 3                   | 18.8% | 1               | 2.9%  | 4                  | 13.8% |
| Urgency            | 4    | 6.3%  | 0                 | 0.0%  | 0                        | 0.0%  | 2              | 9.5%  | 2                   | 12.5% | 1               | 2.9%  | 3                  | 10.3% |
| Incontinence       | 4    | 6.3%  | 0                 | 0.0%  | 0                        | 0.0%  | 2              | 9.5%  | 2                   | 12.5% | 2               | 5.9%  | 2                  | 6.9%  |
| Menstruation       | 4    | 6.3%  | 2                 | 13.3% | 0                        | 0.0%  | 1              | 4.8%  | 1                   | 6.3%  | 3               | 8.8%  | 1                  | 3.4%  |
| Fall               | 4    | 6.3%  | 1                 | 6.7%  | 2                        | 18.2% | 0              | 0.0%  | 1                   | 6.3%  | 2               | 5.9%  | 2                  | 6.9%  |
| Health             | 4    | 6.3%  | 2                 | 13.3% | 0                        | 0.0%  | 0              | 0.0%  | 2                   | 12.5% | 1               | 2.9%  | 3                  | 10.3% |
| Difficulty-Pain    | 4    | 6.3%  | 0                 | 0.0%  | 1                        | 9.1%  | 2              | 9.5%  | 1                   | 6.3%  | 4               | 11.8% | 0                  | 0.0%  |
| Water              | 3    | 4.8%  | 0                 | 0.0%  | 2                        | 18.2% | 0              | 0.0%  | 1                   | 6.3%  | 2               | 5.9%  | 1                  | 3.4%  |

Only one respondent mentioned each of the following concerns: Limit Water (RM); Light (RM).

Six women did not indicate any concerns related to urination: 1 UM, 1 RM, 1 M, and 3 OW; 3 have latrines and 3 do not.

**Supplemental Table 3: Type and frequency of defecation-related concerns overall, and by participant type and latrine status**

| Concern            | All  |       | 1. Unmarried (UM) |       | 2. Recently Married (RM) |       | 3. Married (M) |       | 4. Older Woman (OW) |       | Latrine At Home |       | No Latrine At Home |       |
|--------------------|------|-------|-------------------|-------|--------------------------|-------|----------------|-------|---------------------|-------|-----------------|-------|--------------------|-------|
|                    | N=65 |       | n=14              |       | n=11                     |       | n=21           |       | n=19                |       | n=33            |       | n=31               |       |
| Place              | 47   | 72.3% | 10                | 71.4% | 8                        | 72.7% | 15             | 71.4% | 14                  | 73.7% | 17              | 51.5% | 30                 | 96.8% |
| Fear               | 36   | 55.4% | 10                | 71.4% | 5                        | 45.5% | 12             | 57.1% | 9                   | 47.4% | 16              | 48.5% | 20                 | 64.5% |
| Need Support       | 33   | 50.8% | 5                 | 35.7% | 6                        | 54.5% | 13             | 61.9% | 9                   | 47.4% | 16              | 48.5% | 17                 | 54.8% |
| People             | 27   | 41.5% | 9                 | 64.3% | 5                        | 45.5% | 7              | 33.3% | 6                   | 31.6% | 8               | 24.2% | 19                 | 61.3% |
| No Proper Facility | 23   | 35.4% | 3                 | 21.4% | 3                        | 27.3% | 10             | 47.6% | 7                   | 36.8% | 1               | 3.0%  | 22                 | 71.0% |
| Get Dirty          | 21   | 32.3% | 5                 | 35.7% | 5                        | 45.5% | 6              | 28.6% | 5                   | 26.3% | 6               | 18.2% | 15                 | 48.4% |
| Support Others     | 20   | 30.8% | 3                 | 21.4% | 3                        | 27.3% | 4              | 19.0% | 10                  | 52.6% | 9               | 27.3% | 11                 | 35.5% |
| Water              | 18   | 27.7% | 3                 | 21.4% | 3                        | 27.3% | 7              | 33.3% | 4                   | 21.1% | 12              | 36.4% | 6                  | 19.4% |
| Walk               | 17   | 26.2% | 1                 | 7.1%  | 1                        | 9.1%  | 5              | 23.8% | 9                   | 47.4% | 6               | 18.2% | 11                 | 35.5% |
| Suppress           | 15   | 23.1% | 6                 | 42.9% | 2                        | 18.2% | 5              | 23.8% | 2                   | 10.5% | 6               | 18.2% | 9                  | 29.0% |
| Dependents         | 14   | 21.5% | 2                 | 14.3% | 3                        | 27.3% | 5              | 23.8% | 4                   | 21.1% | 8               | 24.2% | 6                  | 19.4% |
| Health             | 13   | 20.0% | 5                 | 35.7% | 1                        | 9.1%  | 4              | 19.0% | 3                   | 15.8% | 5               | 15.2% | 8                  | 25.8% |
| Squat              | 13   | 20.0% | 0                 | 0.0%  | 2                        | 18.2% | 6              | 28.6% | 5                   | 26.3% | 8               | 24.2% | 5                  | 16.1% |
| Support Barrier    | 13   | 20.0% | 4                 | 28.6% | 2                        | 18.2% | 4              | 19.0% | 3                   | 15.8% | 6               | 18.2% | 7                  | 22.6% |
| Wet                | 13   | 20.0% | 5                 | 35.7% | 2                        | 18.2% | 2              | 9.5%  | 4                   | 21.1% | 6               | 18.2% | 7                  | 22.6% |
| Shame              | 12   | 18.5% | 6                 | 42.9% | 1                        | 9.1%  | 3              | 14.3% | 2                   | 10.5% | 4               | 12.1% | 8                  | 25.8% |
| Latrine Conditions | 11   | 16.9% | 1                 | 7.1%  | 5                        | 45.5% | 3              | 14.3% | 2                   | 10.5% | 10              | 30.3% | 1                  | 3.2%  |
| Obligations        | 11   | 16.9% | 4                 | 28.6% | 0                        | 0.0%  | 6              | 28.6% | 1                   | 5.3%  | 5               | 15.2% | 6                  | 19.4% |
| Urgency            | 10   | 15.4% | 3                 | 21.4% | 0                        | 0.0%  | 4              | 19.0% | 3                   | 15.8% | 2               | 6.1%  | 8                  | 25.8% |
| Latrine Unusable   | 10   | 15.4% | 1                 | 7.1%  | 3                        | 27.3% | 3              | 14.3% | 3                   | 15.8% | 10              | 30.3% | 0                  | 0.0%  |
| Work               | 9    | 13.8% | 0                 | 0.0%  | 1                        | 9.1%  | 5              | 23.8% | 3                   | 15.8% | 4               | 12.1% | 5                  | 16.1% |
| Harm               | 8    | 12.3% | 2                 | 14.3% | 0                        | 0.0%  | 5              | 23.8% | 1                   | 5.3%  | 1               | 3.0%  | 7                  | 22.6% |
| Fall               | 7    | 10.8% | 0                 | 0.0%  | 1                        | 9.1%  | 2              | 9.5%  | 4                   | 21.1% | 1               | 3.0%  | 6                  | 19.4% |
| Stand              | 7    | 10.8% | 2                 | 14.3% | 2                        | 18.2% | 0              | 0.0%  | 3                   | 15.8% | 0               | 0.0%  | 7                  | 22.6% |
| Defecation Time    | 6    | 9.2%  | 2                 | 14.3% | 1                        | 9.1%  | 3              | 14.3% | 0                   | 0.0%  | 3               | 9.1%  | 3                  | 9.7%  |
| Difficulty-Pain    | 6    | 9.2%  | 0                 | 0.0%  | 0                        | 0.0%  | 3              | 14.3% | 3                   | 15.8% | 3               | 9.1%  | 3                  | 9.7%  |
| No Money           | 5    | 7.7%  | 0                 | 0.0%  | 1                        | 9.1%  | 3              | 14.3% | 1                   | 5.3%  | 1               | 3.0%  | 4                  | 12.9% |
| Scold              | 5    | 7.7%  | 1                 | 7.1%  | 0                        | 0.0%  | 3              | 14.3% | 1                   | 5.3%  | 0               | 0.0%  | 5                  | 16.1% |
| Cleaning Self      | 4    | 6.2%  | 0                 | 0.0%  | 0                        | 0.0%  | 2              | 9.5%  | 2                   | 10.5% | 2               | 6.1%  | 2                  | 6.5%  |
| Forced Latrine Use | 4    | 6.2%  | 1                 | 7.1%  | 3                        | 27.3% | 0              | 0.0%  | 0                   | 0.0%  | 4               | 12.1% | 0                  | 0.0%  |
| Defecate On Self   | 3    | 4.6%  | 1                 | 7.1%  | 0                        | 0.0%  | 2              | 9.5%  | 0                   | 0.0%  | 1               | 3.0%  | 2                  | 6.5%  |
| Limit Food         | 3    | 4.6%  | 0                 | 0.0%  | 0                        | 0.0%  | 3              | 14.3% | 0                   | 0.0%  | 0               | 0.0%  | 3                  | 9.7%  |

Only two respondents mentioned each of the following concerns: Concern For Others (1 M, 1 OW); Fixed Time (2 RM); Light (2 RM); Future Needs (1 M, 1 OW).

Only one respondent mentioned each of the following concerns: No Support (M); Incontinence (M); Menstruation (OW).

Four women did not indicate any concerns related to defecation 2 UM, 1 RM, and 1 M; All 4 have latrines.

**Supplemental Table 4: Type and frequency of menstruation-related concerns overall, by participant type, and latrine status**

| Concern              | All  |       | 1. Unmarried (UM) |       | 2. Recently Married (RM) |       | 3. Married (M) |       | 4. Older Woman (OW) |       | Latrine At Home |       | No Latrine At Home |       |
|----------------------|------|-------|-------------------|-------|--------------------------|-------|----------------|-------|---------------------|-------|-----------------|-------|--------------------|-------|
|                      | N=67 |       | n=16              |       | n=12                     |       | n=21           |       | n=18                |       | n=37            |       | n=30               |       |
| Bathing              | 35   | 52.2% | 12                | 75.0% | 7                        | 58.3% | 13             | 61.9% | 3                   | 16.7% | 19              | 51.4% | 16                 | 53.3% |
| Washing Cloth        | 34   | 50.7% | 8                 | 50.0% | 8                        | 66.7% | 9              | 42.9% | 9                   | 50.0% | 19              | 51.4% | 16                 | 53.3% |
| Drying Cloth         | 31   | 46.3% | 10                | 62.5% | 3                        | 25.0% | 11             | 52.4% | 7                   | 38.9% | 16              | 43.2% | 15                 | 50.0% |
| General Discomfort   | 29   | 43.3% | 11                | 68.8% | 2                        | 16.7% | 7              | 33.3% | 10                  | 55.6% | 12              | 32.4% | 17                 | 56.7% |
| People               | 25   | 37.3% | 8                 | 50.0% | 4                        | 33.3% | 7              | 33.3% | 6                   | 33.3% | 13              | 35.1% | 12                 | 40.0% |
| Pain                 | 23   | 34.3% | 8                 | 50.0% | 4                        | 33.3% | 7              | 33.3% | 6                   | 33.3% | 13              | 35.1% | 12                 | 40.0% |
| Feel Dirty           | 20   | 29.9% | 8                 | 50.0% | 4                        | 33.3% | 3              | 14.3% | 5                   | 27.8% | 9               | 24.3% | 11                 | 36.7% |
| Restrictions         | 20   | 29.9% | 7                 | 43.8% | 3                        | 25.0% | 6              | 28.6% | 4                   | 22.2% | 13              | 35.1% | 7                  | 23.3% |
| Irregularity         | 18   | 26.9% | 4                 | 25.0% | 6                        | 50.0% | 6              | 28.6% | 2                   | 11.1% | 14              | 37.8% | 4                  | 13.3% |
| Need Support         | 15   | 22.4% | 4                 | 25.0% | 2                        | 16.7% | 7              | 33.3% | 2                   | 11.1% | 10              | 27.0% | 5                  | 16.7% |
| Work                 | 13   | 19.4% | 1                 | 6.3%  | 3                        | 25.0% | 5              | 23.8% | 4                   | 22.2% | 4               | 10.8% | 9                  | 30.0% |
| Wounds               | 13   | 19.4% | 3                 | 18.8% | 2                        | 16.7% | 5              | 23.8% | 3                   | 16.7% | 6               | 16.2% | 7                  | 23.3% |
| Leaks                | 12   | 17.9% | 3                 | 18.8% | 2                        | 16.7% | 4              | 19.0% | 3                   | 16.7% | 7               | 18.9% | 5                  | 16.7% |
| Obligations          | 12   | 17.9% | 2                 | 12.5% | 1                        | 8.3%  | 4              | 19.0% | 5                   | 27.8% | 4               | 10.8% | 8                  | 26.7% |
| Water                | 12   | 17.9% | 4                 | 25.0% | 4                        | 33.3% | 2              | 9.5%  | 2                   | 11.1% | 6               | 16.2% | 6                  | 20.0% |
| Forced Separation    | 11   | 16.4% | 2                 | 12.5% | 2                        | 16.7% | 4              | 19.0% | 3                   | 16.7% | 5               | 13.5% | 6                  | 20.0% |
| Access to Materials  | 10   | 14.9% | 5                 | 31.3% | 4                        | 33.3% | 1              | 4.8%  | 0                   | 0.0%  | 8               | 21.6% | 2                  | 6.7%  |
| Shame                | 8    | 11.9% | 2                 | 12.5% | 2                        | 16.7% | 3              | 14.3% | 1                   | 5.6%  | 5               | 13.5% | 3                  | 10.0% |
| Constrained Mobility | 7    | 10.4% | 1                 | 6.3%  | 4                        | 33.3% | 2              | 9.5%  | 0                   | 0.0%  | 4               | 10.8% | 3                  | 10.0% |
| Heavy Bleeding       | 7    | 10.4% | 1                 | 6.3%  | 0                        | 0.0%  | 3              | 14.3% | 3                   | 16.7% | 2               | 5.4%  | 5                  | 16.7% |
| Health               | 6    | 9.0%  | 1                 | 6.3%  | 3                        | 25.0% | 1              | 4.8%  | 1                   | 5.6%  | 5               | 13.5% | 1                  | 3.3%  |
| Odor                 | 6    | 9.0%  | 2                 | 12.5% | 0                        | 0.0%  | 2              | 9.5%  | 2                   | 11.1% | 2               | 5.4%  | 4                  | 13.3% |
| Disposal             | 5    | 7.5%  | 1                 | 6.3%  | 3                        | 25.0% | 1              | 4.8%  | 0                   | 0.0%  | 4               | 10.8% | 1                  | 3.3%  |
| Untouchability       | 5    | 7.5%  | 1                 | 6.3%  | 1                        | 8.3%  | 2              | 9.5%  | 1                   | 5.6%  | 2               | 5.4%  | 3                  | 10.0% |
| Changing Cloth       | 4    | 6.0%  | 2                 | 12.5% | 2                        | 16.7% | 0              | 0.0%  | 0                   | 0.0%  | 3               | 8.1%  | 1                  | 3.3%  |
| Sleep                | 4    | 6.0%  | 0                 | 0.0%  | 0                        | 0.0%  | 3              | 14.3% | 1                   | 5.6%  | 2               | 5.4%  | 2                  | 6.7%  |
| Support Barrier      | 4    | 6.0%  | 2                 | 12.5% | 0                        | 0.0%  | 2              | 9.5%  | 0                   | 0.0%  | 4               | 10.8% | 0                  | 0.0%  |

*Only three respondents mentioned each of the following concerns: Fear (2 UM, 1 RM); Fertility (1 RM, 2 M); Storing Cloth (1 UM, 1 RM, 1 OW).*

*Only two respondents mentioned each of the following concerns: Falling Cloth (1 UM, 1 RM); Start when Away (1 UM, 1 M); Urination (1 UM, 1 M).*

*Two women did not indicate any concerns related to menstruation: 1 M and 1 OW; neither have latrines.*
